# Supplementary material
Source: PubMed Central journal article supplement (PMC4468720)
Supplement: AAC.05077-14_zac007154159so1.pdf [file AAC.05077-14_zac007154159so1.pdf]

Figure S1. Summary of kill curve results for antimicrobials tested in study on 9 daptomycin non-susceptible *Enterococcus* isolates.

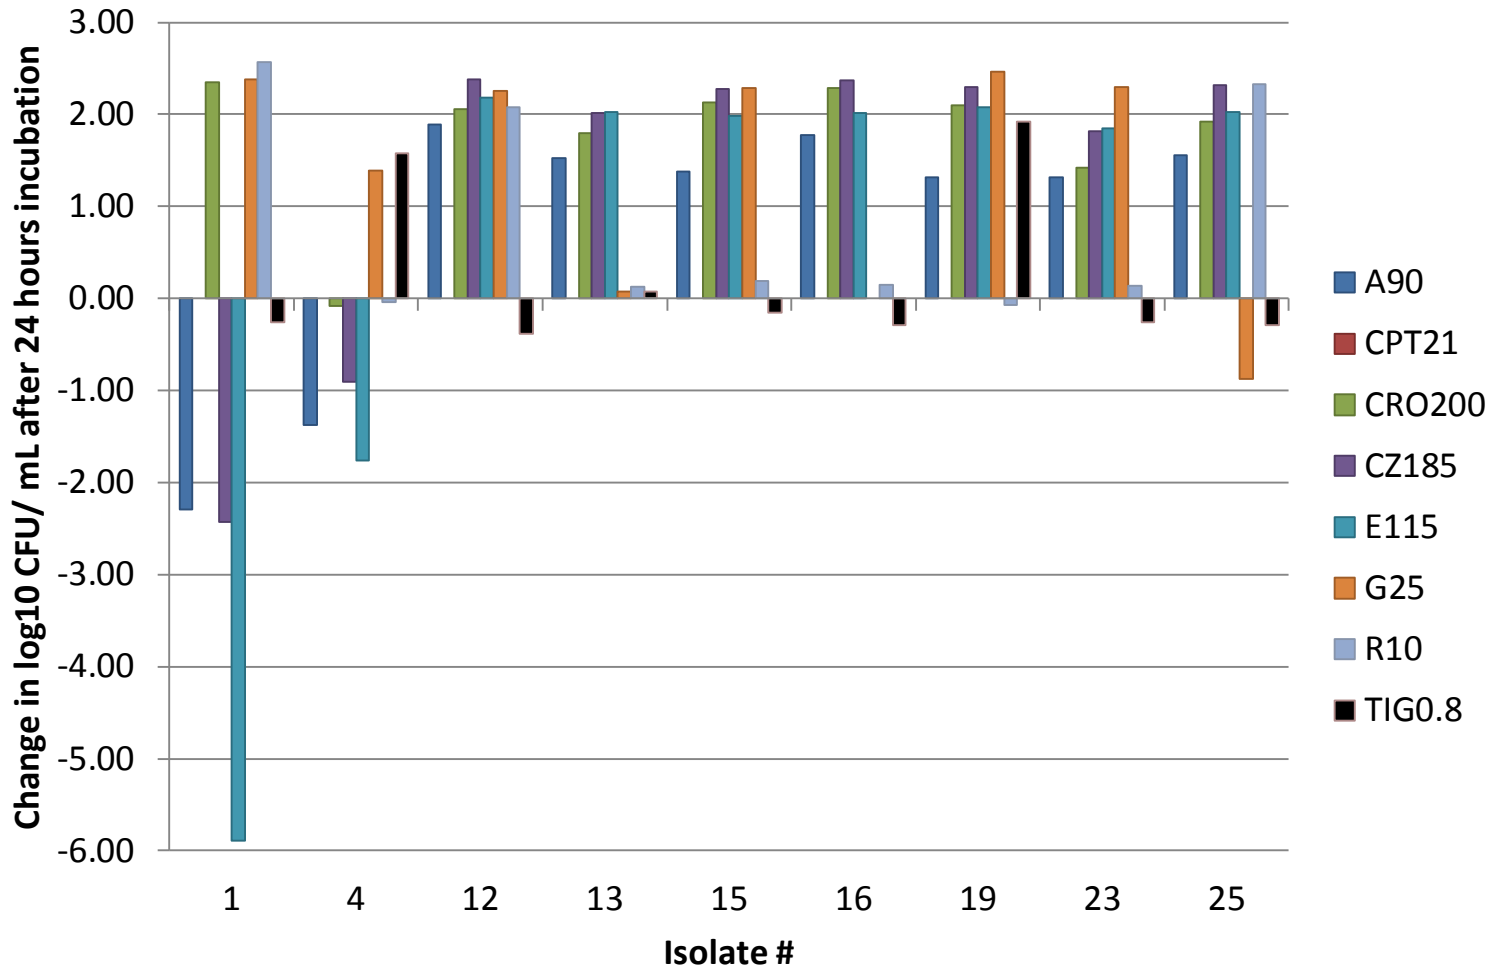

Legend:

- A90, 90µg/mL ampicillin
- CPT21, 21µg/mL ceftaroline
- CRO200, 200µg/mL ceftriaxone
- CZ185, 185µg/mL cefazolin
- E115, 115 µg/mL ertapenem
- G25, 25 µg/mL gentamicin
- R10, 10 µg/mL rifampin
- TIG0.8, 0.8 µg/mL tigecycline
